# Supplementary material for: Highly sensitive and selective detection of naproxen via molecularly imprinted carbon dots as a fluorescent sensor
Source: Royal Society of Chemistry journal article supplement (doi:10.1039/d1ra04817a), 2021-01-01
Supplement: d1ra04817a1.pdf [file d1ra04817a1.pdf]

## *Supporting information*

# **Highly Sensitive and Selective Detection of Naproxen via Molecularly Imprinted Carbon Dots as a Fluorescent Sensor**

Ke Li<sup>a</sup>, Min Zhang<sup>a</sup>, Xingyu Ye<sup>b</sup>, Yongming Zhang<sup>a</sup>, Guisheng Li<sup>b</sup>, Rui Fu<sup>c</sup>, and Xiaofeng Chen<sup>\*a</sup>

<sup>a</sup> *School of Environmental and Geographical Sciences, Shanghai Normal University, Shanghai 200234, China. E-mail: xiaofengchen@shnu.edu.cn*

<sup>b</sup> *Education Ministry Key and International Joint Lab of Resource Chemistry, Shanghai Key Laboratory of Rare Earth Functional Materials, Shanghai Normal University, Shanghai 200234, China.*

<sup>c</sup> *RNA Bioscience Initiative, University of Colorado School of Medicine, Aurora, CO, 80045, USA.*

**Table S1.** The preparation recipe of human urine sample.

| Compound                                     | Mass or Volume |
|----------------------------------------------|----------------|
| NaCl                                         | 0.52 g         |
| CaCl <sub>2</sub>                            | 0.028 g        |
| MgSO <sub>4</sub>                            | 0.24 g         |
| KH <sub>2</sub> PO <sub>4</sub>              | 0.142 g        |
| KH <sub>2</sub> PO <sub>4</sub>              | 0.16 g         |
| C <sub>6</sub> H <sub>8</sub> O <sub>7</sub> | 1.5 g          |
| CH <sub>3</sub> CHOHCOOH                     | 0.009 g        |
| CO(NH <sub>2</sub> ) <sub>2</sub>            | 1.021 g        |
| NH <sub>4</sub> Cl                           | 0.134 g        |
| NaHCO <sub>3</sub>                           | 0.21 g         |
| H <sub>2</sub> O                             | 100 mL         |

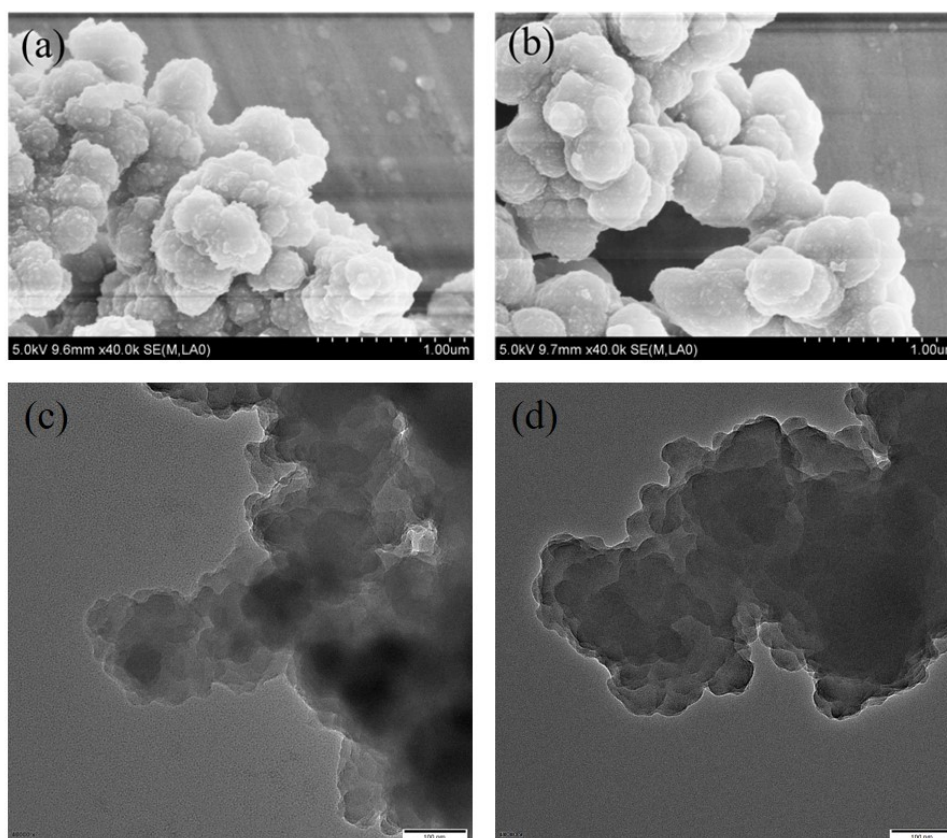

**Fig. S1.** SEM and TEM images of (a, c) MIP@CDs; (b, d) NIP@CDs.

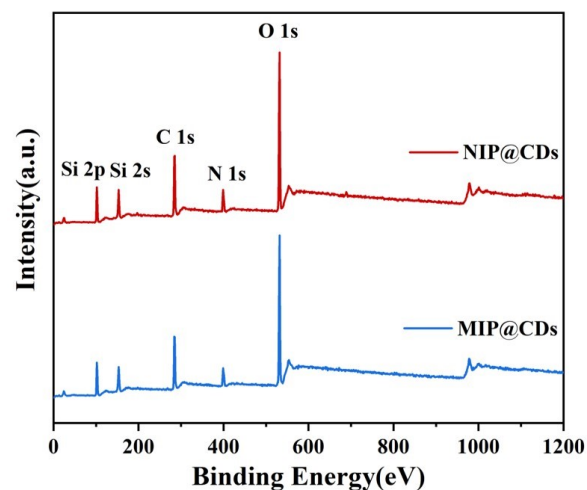

**Fig. S2.** The XPS survey scans of MIP@CDs and NIP@CDs.

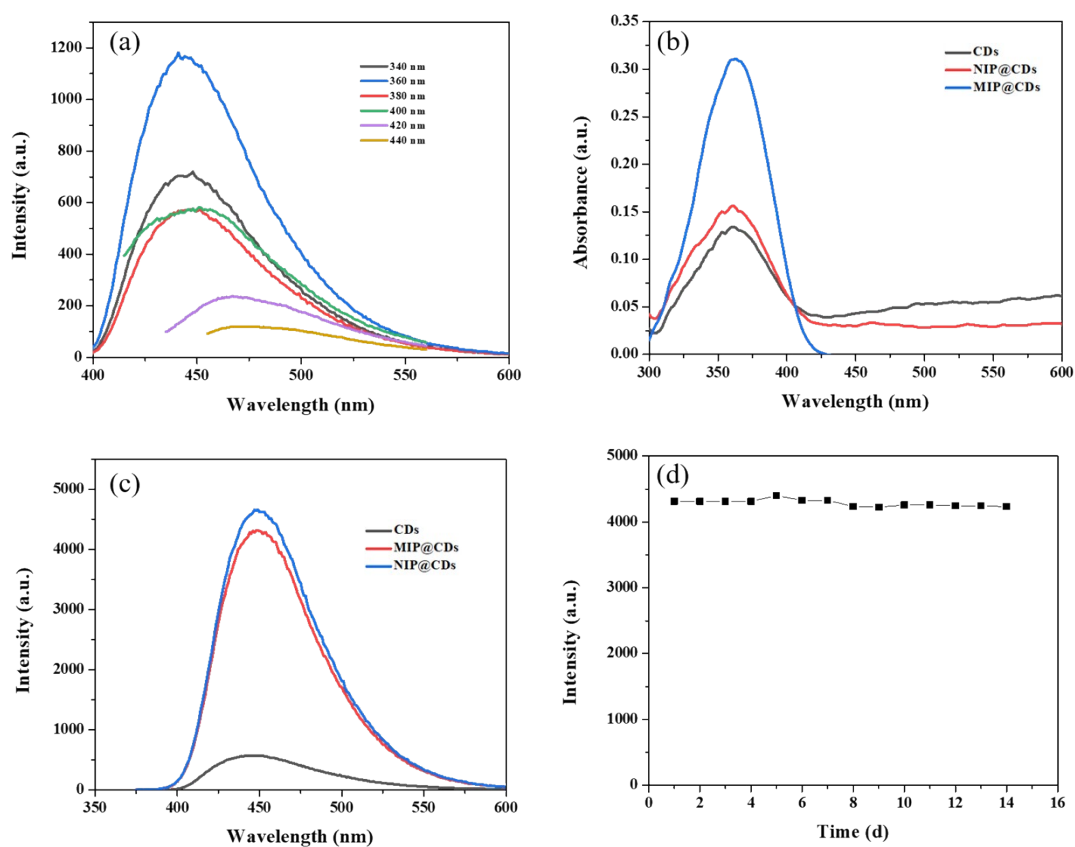

**Fig. S3.** (a) The emission spectra of the CDs in ethanol with different excitation wavelengths; Absorption (b) and emission (c) spectra of CDs, MIP@CDs, NIP@CDs; (d) The emission intensity of MIP@CDs (280 mg/L) at 448nm within 14 days.

**Table S2** Different methods for naproxen detection.

| Method                        | Materials                                  | LOD           | Linear range    | references |
|-------------------------------|--------------------------------------------|---------------|-----------------|------------|
| Electrochemical method        | AgNPs@GO- $\beta$ -CD                      | 0.08 $\mu$ M  | 0.4-80 $\mu$ M  | 1          |
| Chiral electrochemical method | L- CYS/AuNPs/Au E                          | 0.67 $\mu$ M  | 2-20 $\mu$ M    | 2          |
| Photoelectrochemical method   | BiVO <sub>4</sub> /CuO                     | 5 nM          | 5-480 nM        | 3          |
| Plasmon method                | T $\beta$ -CD-Au NPs                       | 0.6 $\mu$ g/L | 4-180 $\mu$ g/L | 4          |
| Electrochemical method        | FeNi <sub>3</sub> /CuS/BiOCl nanocomposite | 0.06 $\mu$ M  | 0.2-500 $\mu$ M | 5          |
| Microextraction method        | Hollow fiber liquid                        | 1.3 ng/L      | 4-300 ng/L      | 6          |
| Fluorescent method            | MIP@CDs                                    | 0.03 $\mu$ M  | 0.05-4 $\mu$ M  | this work  |

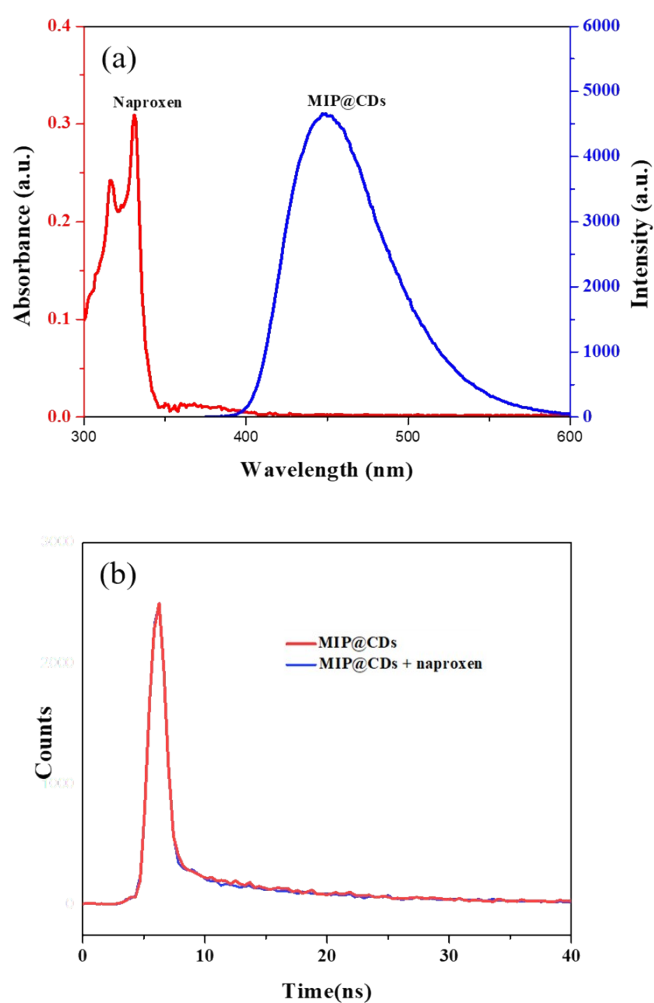

**Fig. S4.** (a) Absorption spectra of naproxen and emission spectra of MIP@CDs; (b) Fluorescence decay traces of MIP@CDs in the absence and presence of naproxen.

**References:**

- 1 S. Tarahomi, G. H. Rounaghi, L. Daneshvar, *Sens. Actuators B Chem.*, 2019, **286**, 445-450.
- 2 A. Afkhami, F. Kafrashi, M. Ahmadi, T. Madrakian, *RSC Adv.*, 2015, **5**, 58609-58615.

- 3 T. M. Prado, C. C. Badaró, R. G. Machado, S. FadiniP, O, Fatibello-Filho, F. C. Moraes, *Electroanalysis*, 2020, **32**, 1930-1937.
- 4 J. Khodaveisi, A. M. H. Shabani, S. Dadfarnia, D. A. Saberi, *Spectrochim Acta A Mol Biomol Spectrosc.*, 2017, **179**, 11-16.
- 5 P. M. Jahani, H. A. Javar, H. Mahmoudi-Moghaddam, *J Mater Sci: Mater Electron*, 2020, **31**, 14022-14034.
- 6 M. Asadi, S. Dadfarnia, A. M. H. Shabani, B. Abbasi, *Food Anal. Methods*, 2016, **9**, 2762-2772.
